# Supplementary material for: Extensive Transcriptomic and Genomic Analysis Provides New Insights about Luminal Breast Cancers
Source: PLoS One. 2016 Jun 24;11(6):e0158259. doi: 10.1371/journal.pone.0158259 (PMC4920434; doi:10.1371/journal.pone.0158259)
Supplement: S5 Table — The list of nine Affymetrix probes mapped from the top ten genes defined in the Illumina platform, delineating the molecular signature of patients at risk, is provided in this table. (XLS) [file pone.0158259.s013.xls]

## Sheet: Sheet1
Gene	Affymetrix probe
POLQ	219510_at
KIFC1	209680_s_at
FOXM1	202580_x_at
TROAP	204649_at
UBE2C	202954_at
AURKB	209464_at
NCAPG	218662_s_at
HJURP	218726_at
MCM10	220651_s_at
